# Supplementary material for: Preserving Biodiversity in Marginal Rural Areas: Assessment of Morphological and Genetic Variability of a Sicilian Common Bean Germplasm Collection
Source: Plants (Basel). 2020 Aug 4;9(8):989. doi: 10.3390/plants9080989 (PMC7463873; doi:10.3390/plants9080989)
Supplement: Supplementary file 1 [file plants-09-00989-s001.zip]

Archive with 11 entries (11 files):
- Table S3.xlsx
- Table S4.xlsx
- Table S5.xlsx
- Table S6.xlsx
- Table S7.xlsx
- Table S8.xlsx
- Table S9.xlsx
- Table S10.xlsx
- plants-858461 - supplemenary figures for XML.pdf
- Table S1.xlsx
- Table S2.xlsx
