# Supplementary material for: Preserving Biodiversity in Marginal Rural Areas: Assessment of Morphological and Genetic Variability of a Sicilian Common Bean Germplasm Collection
Source: Plants (Basel). 2020 Aug 4;9(8):989. doi: 10.3390/plants9080989 (PMC7463873; doi:10.3390/plants9080989)
Supplement: Supplementary file 1 [file plants-09-00989-s001.zip › Table S1.xlsx]

## Sheet: Foglio1
Table S1. Quanti-qualitative descriptors of seed, flower, leaf and pod recorded on fifty-seven Phaseolus vulgaris L. landraces conserved at SPGR/PA.
Accession number	Local name of landraces	Seed coat pattern (SCP)	Seed coat color					Seed shape (SSH)	Brilliance (BS)	Seed Morphotype code	Flower color		Pod color		Pod curvature (PC)	Leaf shape (LS)	Seed lengtha (mm) (SL)	Seed heightb (mm) (SH)	Seed width (mm) (SW)	Seed/ pod (n) (SxP)	Pod length (cm) (PL)	100-seed weight c (g) (100W)	Dry bean yield (Kg/mq) (Y)
			darker (CSCD)*		lighter (CSCL)		prevalent (PCSC)				banner (CFB)	wings (CFW)	immature (IPC)	mature (MPC)
58/2015	Fasolu del Prete'	9	8		1		3	1	5	981315	1	1	11	4	7	2	11.7	8.1	9.3	6.7	9.03	57.8	0.80
59/2015	Carrubara Baccello Rugoso'	1	6		4		1	4	5	164145	1	1	7	4	9	2	15.3	5.5	7.0	8.7	15.83	44.5	1.53
60/2015	'Buttuna di Gaddru'	2	7		5		1	4	7	275147	3	3	4	1	7	2	20.1	8.0	10.3	10.7	17.97	79.6	2.55
61/2015	'Curnittu Calabrisi'	1	4		5		3	1	7	145317	3	3	7	5	5	2	11.5	7.3	6.7	6.8	11.00	61.2	3.48
62/2015	'Carrubaru Niuru'	0	8		0		0	4	7	080047	3	3	7	5	5	3	12.0	4.5	6.2	7.7	14.50	31.0	2.36
63/2015	'Carrazzu Crioto'	2	8 (73%)	6 (27%)	5		1	3	3	285133	3	3	3	1	7	2	16.7	7.6	8.6	6.0	13.17	75.3	1.67
64/2015	'Calabrisi Baccello Drittu'	1	4		2		1	3	5	142135	3	1	5	4	5	2	11.9	6.2	8.8	7.3	9.70	49.9	1.29
65/2015	'Calabrisi Biancu'	0	0		1		0	4	3	001043	1	1	10	4	1	2	14.8	5.3	6.9	13.0	16.00	36.3	2.17
66/2015	'Carrazzu Viola'	2	7		5		1	3	5	275135	3	3	7	1	8	3	16.3	7.0	9.7	7.3	10.50	59.2	1.98
67/2015	'Bavaluciaru di Tri Voti'	2	4		2		1	2	5	242125	1	1	7	4	5	3	15.2	7.3	7.9	7.0	11.80	68.7	2.25
68/2015	'Rosa Lungo'	1	4		5		3	4	5	145345	3	3	7	4	8	2	17.9	8.0	10.7	7.3	15.20	75.3	1.31
69/2015	'Carrazzu di Maisa'	3	7		5		1	3	5	375135	9	8	7	5	7	3	15.1	5.2	9.9	6.7	9.60	49.0	2.07
70/2015	'Fasolu di Pasta Biancu'	0	0		1		0	4	3	001043	1	1	7	4	7	3	16.1	6.4	6.6	7.3	18.10	55.6	1.49
71/2015	'Santagasi'	1	6		5		3	4	3	165343	3	1	7	4	8	2	18.4	9.1	8.9	5.7	14.50	61.6	2.32
72/2015	'Carrazzu Rosa'	2	6		5		1	3	7	265137	3	1	7	4	8	2	14.3	6.9	8.8	7.3	10.23	58.3	1.08
73/2015	'Fasolu di Petra'	2	6		5		1	3	5	265135	3	1	7	4	7	2	14.2	5.9	9.1	5.7	8.20	54.4	1.28
74/2015	'Mignacca'	3	6		5		1	1	7	365117	3	1	4	5	7	3	15.0	8.0	11.0	4.7	10.60	51.5	1.81
75/2015	'Calabrisi'	1	4		5		3	1	5	145315	3	1	5	4	7	2	10.4	7.6	8.7	6.7	8.73	58.2	3.16
76/2015	'Crucchittu Settembrinu'	3	6		5		2	2	5	365225	3	1	7	4	8	3	10.9	6.6	7.4	8.3	9.03	40.9	2.58
77/2015	'Carrazzu du Miricanu'	2	8 (53%)	6 (47%)	5		1	3	5	285135	9	3	3	5	5	3	14.9	5.9	7	6.0	12.80	66.2	2.39
78/2015	'Tignusu Calabrisi'	0	0		4		0	4	3	004043	1	1	7	4	5	3	16.8	5.9	9.0	10.7	17.77	45.2	2.30
79/2015	'Ucchittu di zappa'	6	7		1		1	2	3	671123	1	1	7	4	8	3	18.6	11.7	7.3	5.3	9.33	52.3	5.20
80/2015	'Vanadia di Tortorici'	0	0		5		0	3	7	005037	3	1	4	4	7	2	9.4	6.8	7.9	5.7	10.17	57.4	2.20
81/2015	'Carrazzu pi Siccari'	2	8 (26%)	6 (74%)	5		1	3	7	265137	9	8	3	5	5	3	15.1	5.8	9.7	6.7	11.77	64.2	2.14
82/2015	'Setticanni'	0	8		0		0	1	5	080015	9	8	11	5	8	3	13.0	7.2	8.5	5.0	9.67	51.0	1.83
83/2015	'Ucchittu Santangilisi'	6	7		1		1	2	3	671123	1	1	7	4	8	2	14.1	7.4	8.4	6.7	9.96	57.7	3.63
84/2015	'Crucchittu Criotu'	3	6		5		2	3	5	365235	9	3	11	4	9	2	13.8	5.9	6.9	6.3	13.93	56.9	0.51
85/2015	'Carrubara Baccello Liscio'	1	6		4		1	4	3	164143	1	1	11	4	5	2	16.7	7.0	6.8	7.7	17.47	45.5	1.31
86/2015	'Fasolu di Caminu'	0	8		0		0	1	5	080015	9	8	7	4	8	2	13.1	8.0	10.4	6.3	13.13	59.6	1.47
87/2015	'Lumachedda Chiara'	2	4		2		1	1	3	242113	3	1	7	4	1	2	11.3	6.2	8.2	5.7	9.10	45.5	1.88
88/2015	'Carrazzu di Ucria'	2	8		2		1	3	3	282133	3	3	3	5	5	3	13.4	7.1	7.2	7.0	9.77	60.5	0.53
89/2015	'Crucchittu di Floresta'	0	7		0		0	3	7	070037	3	3	2	4	9	3	12.9	6.9	6.5	7.3	8.33	76.4	1.30
91/2015	'Occhiu di Pirnici'	11	(8/4)**		1		1	3	3	11(8/4)1133	1	1	7	4	8	3	14.8	7.2	8.5	6.7	11.80	52.9	4.06
92/2015	'Sanfratellano'	1	4		2		1	3	3	142133	9	3	2	1	1	3	12.8	6.2	4.6	8.7	15.63	60.7	2.43
93/2015	'Crucchittu Rummuletta'	3	6		5		2	3	5	365235	9	8	10	4	8	3	14.0	8.2	7.3	6.7	8.07	41.2	1.35
94/2015	'Rosa Tunnu'	1	4		5		3	1	5	145315	3	1	7	4	8	3	13.1	7.8	7.2	7.3	10.77	69.7	4.02
95/2015	'Carrazzu di Piano Campo'	2	8		2		1	2	7	282127	9	3	7	5	7	2	14.8	6.4	8.7	5.3	9.40	55.8	3.23
96/2015	'Carrazzu Niuru pi Siccari'	0	8		0		0	1	7	080017	9	8	7	5	8	2	11.4	6.2	8.4	5.3	9.10	57.6	3.59
97/2015	'Disio'	0	0		1		0	1	5	001015	1	1	7	4	7	3	12.5	7.9	8.8	5.7	11.30	57.3	3.17
98/2015	'Carrazzu Nustrali'	2	7		5		1	2	7	275127	9	3	7	1	7	2	14.0	6.6	8.0	5.7	12.37	54.1	1.61
99/2015	'Niuru Senza Sfilazzi'	0	7		0		0	3	3	070033	9	8	7	4	7	3	13.2	5.3	5.5	5.3	10.73	34.9	1.80
100/2015	'Fasolu di Padre Bernardinu'	0	0		5		0	3	3	005033	3	1	7	4	8	2	19.5	11.5	11.0	7.3	9.83	45.9	4.56
101/2015	'Virdi Lungarinu'	0	0		5		0	4	5	005045	3	3	7	4	8	2	15.5	5.5	8.0	7.7	14.73	48.0	2.27
102/2015	Pinuttaru'	2	7		5		1	3	5	275135	9	3	7	4	5	3	15.7	6.4	6.0	5.7	13.20	59.9	3.3
103/2015	'Rampicanti Nerella'	0	8 (65%)	7 (35%)	0		0	4	5	080045	9	8	7	4	5	3	11.7	4.8	4.6	8.7	18.23	25.3	2.60
104/2015	'Ianchittu ma Beddu'	0	0		1		0	4	3	001043	1	1	7	4	5	3	14.3	5.2	8.7	8.3	18.53	46.2	2.49
105/2015	Zicca'	0	0		4		0	3	5	004035	9	8	7	4	5	3	8.8	6.0	6.7	6.3	8.27	44.9	2.66
106/2015	'Occhittu Rosa'	6	5		1		1	4	5	651145	1	1	7	4	8	2	13.6	6.1	6.7	8.3	12.00	51.6	3.66
107/2015	'Massaru'	2	7		5		1	2	5	275125	9	3	7	1	8	3	13.3	7.3	10.6	6.3	10.90	57.9	3.59
108/2015	'Nanu Palermitanu'	2	6		5		1	3	5	265135	3	1	4	5	1	1	13.1	6.2	9.1	6.7	11.13	66.8	4.07
109/2015	'Nanu Niuru'	0	8		0		0	3	3	080033	9	8	7	1	1	1	9.1	5.4	4.8	8.7	9.93	23.7	2.02
110/2015	'Nanu Virdi'	0	0		5		0	4	5	005045	1	1	7	4	5	1	14.5	6.4	6.1	7.3	9.63	50.3	1.19
112/2015	'Nanu Calabrisi'	0	0		5		0	4	3	005043	3	1	4	1	5	2	14.7	7.3	6.7	6.7	17.97	54.8	1.45
113/2015	'Nanu di Castania'	0	0		3		0	3	3	003033	1	1	7	4	5	2	12.2	7.1	6.7	6.0	11.30	53.0	0.43
114/2015	'Nanu Carrazzu'	2	6		5 (17%)	4(83%)	1	3	5	264135	3	1	4	5	5	3	14.5	6.8	6.1	6.3	10.07	56.3	0.69
121/2015	'Munachedda'	9	8		1		3	1	5	981315	1	10***	7	4	1	3	11.7	9.9	7.5	5.7	8.10	66.4	3.60
122/2015	'Facigghiuni'	3	6		5		1	4	3	365143	8	8	3	5	8	2	17.7	10.4	6.2	5.7	12.10	80.3	3.08
* in brackets precentage of seed with different color calculated from a bulk of 50 seed for each landrace
** in brackets seed color of intricate coat pattern
***yellow color of wings of flower
a) Measured parallel to the hilum
b) measured from hilum to opposite side
c) Weight of 100 seeds at a moisture content of 6-8%
