# Supplementary material for: Preserving Biodiversity in Marginal Rural Areas: Assessment of Morphological and Genetic Variability of a Sicilian Common Bean Germplasm Collection
Source: Plants (Basel). 2020 Aug 4;9(8):989. doi: 10.3390/plants9080989 (PMC7463873; doi:10.3390/plants9080989)
Supplement: Supplementary file 1 [file plants-09-00989-s001.zip › Table S2.xlsx]

## Sheet: Foglio1
Table S2. Percentage of seed with different striped seed coat color recorded on four landraces across three years.
Landraces	2015		2016		2017
	black	purple	black	purple	black	purple
'Carrazzu Crioto'	75	25	70	30	73	27
Carrazzu du Miricanu'	62	38	53	47	50	50
Carrazzu pi Siccari'	27	73	30	70	26	74
	brown	pink	brown	pink	brown	pink
'Nanu Carrazzu'	78	22	73	27	83	17
