# Supplementary material for: Preserving Biodiversity in Marginal Rural Areas: Assessment of Morphological and Genetic Variability of a Sicilian Common Bean Germplasm Collection
Source: Plants (Basel). 2020 Aug 4;9(8):989. doi: 10.3390/plants9080989 (PMC7463873; doi:10.3390/plants9080989)
Supplement: Supplementary file 1 [file plants-09-00989-s001.zip › Table S3.xlsx]

## Sheet: Foglio1
Table S3. Descriptive statistic of quantitative variables detected on 57 Sicilian landraces. SH = seed height; SW = seed width; SL = seed length; PL = pod length; SxP= seed /pod; 100W = 100-seed weight; Y = dry bean yield; SD= Standard Deviation, CV= Coefficient of Variation expressed as a percentage.
Variable	Mean	SD	CV%	Min		Max
				Value	Landrace	Value	Landrace
SL	14.06	2457	17.47	8.8	'Zicca'	20.07	Buttuna di Gaddru'
SH	14.45	1461	21.01	4.5	'Carrubaru Niuru'	11.7	Ucchittu di Zappa'
SW	7.28	1595	20.11	4.6	'Sanfratellanu'	11.0	'Mignacca'
100W	54.69	12.38	22.64	24.9	'Nanu Niuru'	80.5	'Facigghiuni'
SxP	7.37	1446	19.6	5.37	'Mignacca'	13.27	'Calabrisi Biancu'
PL	11.96	3075	25.7	8.1	'Crucchittu Rummuletta'	18.5	Ianchittu ma Beddu'
Y	2.30	1085	47.15	0.4	Nanu di Castania'	5.2	Ucchittu di Zappa'
