# Supplementary material for: Preserving Biodiversity in Marginal Rural Areas: Assessment of Morphological and Genetic Variability of a Sicilian Common Bean Germplasm Collection
Source: Plants (Basel). 2020 Aug 4;9(8):989. doi: 10.3390/plants9080989 (PMC7463873; doi:10.3390/plants9080989)
Supplement: Supplementary file 1 [file plants-09-00989-s001.zip › Table S4.xlsx]

## Sheet: Foglio1
Table S4. Analysis of variance (ANOVA) of quantitative parameters. SH = seed height; SW = seed width; SL = seed length; PL = pod length; SxP= seed /pod; 100W = 100-seed weight; Y = dry bean yield.
Variable	Df	Sum Sq	Mean Sq	F value	Pr(>F)
SH	56	375.0	63750	8.277	1.52743e-21
SW	56	426.03	7608	8371	1.52743e-21
SL	56	1013.59	18100	17562	1.52743e-21
PL	56	1587.17	28342	12639	1.52743e-21
SxP	56	372.96	6600	6058	1.52743e-21
100W	56	24325.8	434.39	52697	1.52743e-21
Y	57	201.10	35438	74362	1.52743e-21
