# Supplementary material for: Preserving Biodiversity in Marginal Rural Areas: Assessment of Morphological and Genetic Variability of a Sicilian Common Bean Germplasm Collection
Source: Plants (Basel). 2020 Aug 4;9(8):989. doi: 10.3390/plants9080989 (PMC7463873; doi:10.3390/plants9080989)
Supplement: Supplementary file 1 [file plants-09-00989-s001.zip › Table S5.xlsx]

## Sheet: Foglio1
Table S5. Means comparison and post hoc test (Tukey’s) for quantitative parameters. SH = seed height; SW = seed width; SL = seed length; PL = pod length; SxP= seed /pod; 100W = 100-seed weight; Y = dry bean yield. Only Y was compared to Borlotto type as control.
Larndrace	SL (mm)	SH (mm)	SW (mm)	SxP (n)	PL (cm)	100w (g)	Y (Kg m-2)
Fasolu del Prete'	11.7ow	8.1bf	9.3ag	6.7ce	9.03km	57.8em	0.80wz
Carrubara Baccello Rugoso'	15.3cn	5.5eh	7.0el	8.7bc	15.83af	44.5qt	1.53pw
'Buttuna di Gaddru'	20.1 a	8.0bf	10.3ad	10.7ab	17.97ab	79.6 ab	2.55gl
'Curnittu Calabrisi'	11.5qw	7.27ch	6.7el	6.8ce	11.0em	61.2dj	3.48ce
'Carrubaru Niuru'	12.0mw	4.5h	6.2gl	7.7be	14.50aj	31.0uw	2.36in
'Carrazzu Crioto'	16.7ai	7.5bg	8.6ai	6.0ce	13.17bm	75.3bc	1.67nv
'Calabrisi Baccello Drittu'	11.9nw	6.2dh	8.8ai	7.3be	9.70im	49.9kr	1.29tx
'Calabrisi Biancu'	14.8eq	5.3eh	6.9el	13.0a	16.00ae	36.3su	2.17jr
'Carrazzu Viola'	16.3bj	7.0ch	9.7af	7.3be	10.50hm	59.2dl	1.98jt
'Bavaluciaru di Tri Voti'	15.2co	7.3ch	7.9aj	7.0bc	11.8em	68.7ce	2.25jp
'Rosa Lungo'	17.9ae	8.0bf	10.7ab	7.3be	15.20ah	75.3bc	1.31tx
'Carrazzu di Maisa'	15.1dp	5.2fh	9.9ae	6.7ce	9.60jm	49.0lr	2.07js
'Fasolu di Pasta Biancu'	16.1bk	6.4dh	6.6el	7.3be	18.10ab	55.6 gp	1.49qw
'Santagasi'	18.4ad	9.1ad	8.9ah	5.7ce	14.50aj	61.6 di	2.32jo
'Carrazzu Rosa'	14.3fs	6.9dh	8.8ah	7.3be	10.23hm	58.3em	1.08vz
'Fasolu di Petra'	14.2fs	5.9eh	9.1ah	5.7ce	8.20lm	54.4hq	1.28tx
'Mignacca'	15.0dp	8.0bf	11.0a	4.7e	10.60gm	51.5ir	1.81lv
'Calabrisi'	10.40tw	7.6bg	8.7ai	6.7ce	8.73lm	58.2em	3.16eh
'Crucchittu Settembrinu'	10.9sw	6.6dh	7.4cl	8.3bd	9.03km	40.9ru	2.58fk
'Carrazzu du Miricanu'	14.9ep	5,9eh	7,0el	6.0ce	12.80cm	66,2cg	2,39in
'Tignusu Calabrisi'	16.8ah	5.93eh	89.0ah	10.7ab	17.77ac	45.2pt	2.30jo
'Ucchittu di zappa'	18.6ac	11.7 a	7.3dl	5.3ce	9.33km	52.3iq	5.20a
'Vanadia di Tortorici'	9.4uv	6.8dh	7.9ak	5.7ce	10.17hm	57.4fm	2.2jq
'Carrazzu pi Siccari'	15.1dp	5.8eh	9.7af	6.7ce	11.77em	64.2dh	2.14jr
'Setticanni'	13.0jt	7.2ch	8.5ai	5.0de	9.67im	51.0ir	1.83lu
'Ucchittu Santangilisi'	14.1gs	7.4bh	8.4ai	6.7ce	9.97im	57.7fm	3.63ce
'Crucchittu Criotu'	13.8gt	5.9eh	6.9ef	6.3ce	13.93ak	56.9fn	0.51yz
'Carrubara Baccello Liscio'	16.7ai	7.0ch	6.8el	7.7be	17.47ad	45.5ot	1.31tx
'Fasolu di Caminu'	13.1jt	8.0bf	10.4ad	6.3ce	13.13bm	59.6dl	1.47qw
'Lumachedda Chiara'	11.3rw	6.2dh	8.2ai	5.7ce	9.10km	45.5ot	1.88ku
'Carrazzu di Ucria'	13.4ht	7.1ch	7.2dl	7.0bc	9.77im	60.5dk	0.53yz
'Crucchittu di Floresta'	12.9ju	6.9dh	6.5fl	7.3be	8.33lm	76.4ac	1.30tx
'Occhiu di Pirnici'	14.8eq	7.2ch	8.5ai	6.7ce	11.80em	52.9iq	4.06c
'Sanfratellano'	12.8ku	6.2dh	4.6kl	8.7bc	15.63ag	60.7 dk	2.43hm
'Crucchittu Rummuletta'	14.0gs	8.2be	7.3dl	6.7ce	8.07m	41.2ru	1.35sx
'Rosa Tunnu'	13.1jt	7.8bf	7.2dl	7.3be	10.77fm	69.0bd	4.02c
'Carrazzu di Piano Campo'	14.83eq	6.4dh	8.7ai	5.3ce	9.40jm	55.8gp	3.23eg
'Carrazzu Niuru pi Siccari'	11.4qw	6.2dh	8.4ai	5.3ce	9.10km	57.6fm	3.59ce
'Disio'	12.5lv	7.9bf	8.8ai	5.7ce	11.30em	57.3fm	3.17eh
'Carrazzu Nustrali'	14.0gs	6,6dh	7.97 aj	5.7ce	12.37dm	54,1hq	1,61ov
'Niuru Senza Sfilazzi'	13.2jt	5.3eh	5.5il	5.3ce	10.73fm	34.9tv	1.80nv
'Fasolu di Padre Bernardinu'	19.5 ac	11.5a	11.0a	7.3be	9.83im	45.9os	4.56b
'Virdi Lungarinu'	15.47cm	5.5eh	8.0aj	7.7be	14.73ai	48.0mr	2.27jp
Pinuttaru'	15.7cl	6.4dh	6.0hl	5.7ce	13.20bl	59.9dk	3.30df
'Rampicanti Nerella'	11.7pw	4.8gh	4.6l	8.7bc	18.23ab	25.3vw	2.60fk
'Ianchittu ma Beddu'	14.3fs	5.2eh	8.7ai	8.3bd	18.53a	46.2ns	2.49gm
Zicca'	8.8w	6.0eh	6.7el	6.3ce	8.27lm	44.9pt	2.66fj
'Occhittu Rosa'	13.6gt	6.1eh	6.7el	8.3bd	12.00em	51.6ir	3.66ce
'Massaru'	13.3it	7.3ch	10.6ac	6.3ce	10.90em	57.9em	3.59ce
'Nanu Palermitanu'	13.1jt	6.2dh	9.1ah	6.7ce	11.30em	66.8cf	4.07c
'Nanu Niuru'	9.1vw	5.2eh	4.8jl	8.7bc	9.93im	23.7w	2.02jt
'Nanu Virdi'	14.5er	6.4dh	6.1gl	7.3be	9.6 im	50.3jr	1.19uy
'Nanu Calabrisi'	14.7eq	7.27ch	6.7el	6.7ce	17.97ab	54.8hq	1.45rw
'Nanu di Castania'	12.2mw	7.1ch	6.7el	6.0ce	11.13em	53.0iq	0.43z
'Nanu Carrazzu'	14.5er	6.8dh	6.1gl	6.3ce	10.07im	56.3fo	0.69xz
'Munachedda'	11.7ow	9.9ac	7.5 bl	5.7ce	8.10 lm	66.4cg	3.6ce
'Facigghiuni'	17.7ag	10.4ab	6.2 gl	5.7ce	12.10em	80.3a	3.08ei
Borlotto type							3.79ce
