# Supplementary material for: Preserving Biodiversity in Marginal Rural Areas: Assessment of Morphological and Genetic Variability of a Sicilian Common Bean Germplasm Collection
Source: Plants (Basel). 2020 Aug 4;9(8):989. doi: 10.3390/plants9080989 (PMC7463873; doi:10.3390/plants9080989)
Supplement: Supplementary file 1 [file plants-09-00989-s001.zip › Table S6.xlsx]

## Sheet: Table 1
Table 1. Descriptive statistics of genetic variation for each locus. Number of alleles (Na), Observed heterozygosity (Ho), Expected heterozygosity (He), Polymorphic Information Content (PIC), Probability of Identity (PI), Percentage of homozygosity (Hom), Power discrimination (PD).
Locus	Na	Range size (bp)	Ho	He	PIC	PI	Hom.	PD
PVag001	6	137-155	0.333	0.524	0.463	0.288	66.7	0.7120
GATS91	11	214-256	0.035	0.733	0.709	0.0916	96.5	0.9084
BM210	9	167-195	0.0350	0.746	0.713	0.0972	98.2	0.9028
BM160	12	180-256	0.019	0.867	0.853	0.0318	98.2	0.9682
BM159	5	187-199	0.123	0.656	0.593	0.181	91.2	0.8189
PVBR25	13	149-177	0.182	0.802	0.785	0.0564	82.5	0.9436
BM172	9	70-112	0.089	0.636	0.590	0.1687	94.7	0.8313
PVBR163	10	221-259	0.439	0.646	0.607	0.1606	56.1	0.8394
Overall	9.375a	--	0.157 a	0.701 a	0.664 a	2x10-8 b	85.5 a	0.8656 a
aAverage of the estimated value across all loci;
bCombined non-exclusion probability (identity), considering all loci

## Sheet: Table 2 
Table S6. Accession number, local name, collection site (CS), geographic coordinates sites (GCS) and macro sites of sampled landraces.
Accession number	Local name	CS	GCS	Macro site	Accession number	Local name	CS	GCS	Macro site
058/2015	'Fasolu Del Prete'	Piraino (ME)	38°09′42″N 14°51′40″E	Nebrodi Mountains	088/2015	'Carrazzu Di Ucria'	Ucria (ME)	38°03′N 14°53′E	Nebrodi Mountais
059/2015	'Carrubara Baccello Rugoso'	Tortorici (ME)	38°01′51″N 14°49′27″E		089/2015	'Crucchittu Di Floresta'	Floresta (ME)	37°59′N 14°55′E
060/2015	'Buttuna Di Gaddru'	Ucria (ME)	38°03′N 14°53′E		091/2015	'Occhiu Di Pernici'	Sant' Angelo di Brolo (ME)	38°07′N 14°53′E
061/2015	'Curnittu Calabrisi'	Brolo (ME)	38°09′N 14°50′E		092/2015	'Sanfratellanu'	Sanfratello (ME)	38°00′46.03″N
062/2015	'Carrubaru Niuru'	Tortorici (ME)	38°01′51″N 14°49′27″E		093/2015	'Crucchittu Rummuletta'	Tortorici (ME)	38°01′51″N 14°49′27″E
063/2015	'Carrazzu Crioto'	Ucria (ME)	38°03′N 14°53′E		095/2015	'Carrazzu Di Piano Campo'	Ucria (ME)	38°03′N 14°53′E
064/2015	'Calabrisi Baccello Drittu'	Ficarra (ME)	38°06′36″N 14°49′47″E		096/2015	'Carrazzu Niuru Pissiccari'	Ucria (ME)	38°03′N 14°53′E
065/2015	'Calabrisi Biancu'	Piraino (ME)	38°09′42″N 14°51′40″E		097/2015	'Disio'	Ucria (ME)	38°03′N 14°53′E
066/2015	'Carrazzu Viola'	Ucria (ME)	38°03′N 14°53′E		098/2015	'Carrazzu Nustrali'	Ucria (ME)	38°03′N 14°53′E
067/2015	'Bavaluciaru Di Tri Voti'	Ucria (ME)	38°03′N 14°53′E		099/2015	'Niuru Senza Sfilazzi'	Ficarra (ME)	38°06′36″N 14°49′47″E
068/2015	'Rosa Lungo'	Ucria (ME)	38°03′N 14°53′E		100/2015	'Vasolu Di Padre Bernardinu'	Ucria (ME)	38°03′N 14°53′E
069/2015	'Carrazzu Di Maisa'	Ucria (ME)	38°03′N 14°53′E		101/2015	'Virdi Lungarinu'	Naso (ME)	38°07′27″N 14°47′16″E
070/2015	'Vasolu Di Pasta Biancu'	Ficarra (ME)	38°06′36″N 14°49′47″E		102/2015	'Pinnuttaru'	Mirto (ME)	38°05′N 14°45′E
071/2015	'Santagasi'	Mirto (ME)	38°05′N 14°45′E		103/2015	'Rampicante Nerella'	Capo dOrlando (ME)	38°09′N 14°44′E
072/2015	'Carrazzu Rosa'	Ucria (ME)	38°03′N 14°53′E		104/2015	'Ianchittu Ma Beddu'	Ficarra (ME)	38°06′36″N 14°49′47″E
073/2015	Vasolu Di Petra'	Ucria (ME)	38°03′N 14°53′E		105/2015	'Zicca'	Sinagra (ME)	38°05′N 14°51′E
074/2015	'Mignacca'	Ucria (ME)	38°03′N 14°53′E		106/2015	'Occhittu Rosa'	Tortorici (ME)	38°01′51″N 14°49′27″E
075/2015	'Calabrisi'	Patti (ME)	38°08′N 14°58′E		107/2015	'Massaru'	Ficarra (ME)	38°06′36″N 14°49′47″E
076/2015	'Crucchittu Settembrinu'	Raccuja (ME)	38°03′20.11″N14°54′38.19″E		108/2015	'Nanu Palermitanu'	Sinagra (ME)	38°05′N 14°51′E
077/2015	'Carrazzu Du Miricanu'	Ucria (ME)	38°03′N 14°53′E		109/2015	'Nanu Niuru'	Ficarra (ME)	38°06′36″N 14°49′47″E
079/2015	'Ucchittu Di Zappa'	Floresta (ME)	37°59′N 14°55′E		110/2015	'Nanu Virdi'	Castel Umberto (ME)	38°05′N 14°48′E
080/2015	'Vanadia Di Tortorici'	Tortorici (ME)	38°01′51″N 14°49′27″E		113/2015	'Nanu Di Castania'	Castel Umberto (ME)	38°05′N 14°48′E
081/2015	'Carrazzu Pi Siccari'	Tortorici (ME)	38°01′51″N 14°49′27″E		114/2015	'Nanu Carrazzu'	Ucria (ME)	38°03′N 14°53′E
082/2015	'Setticanni'	Sinagra (ME)	38°05′N 14°51′E		094/2015	'Rosa Tunnu'	Naro (AG)	37°17′41″N 13°47′40″E	Province of Agrigento
083/2015	'Ucchittu Santangilisi'	Sant'Angelo di Brolo (ME)	38°07′N 14°53′E		121/2015	'Facigghiuni'	Geraci Siculo (PA)	38°06′56″N 13°21′41″E	Madonie Mountains
084/2015	'Crucchittu Criotu'	Ucria (ME)	38°03′N 14°53′E		122/2015	'Munachedda'	Geraci Siculo (PA)	38°06′56″N 13°21′41″E
085/2015	'Carrubara Baccello Liscio'	Rocca di Capri Leone (ME)	38°05′N 14°44′E		078/2015	'Tignusu Calabrisi'	Messina	38°11′N 15°33′E	Messina
086/2015	'Vasolu Di Caminu'	Ficarra (ME)	38°06′36″N 14°49′47″E		112/2015	'Nanu Calabrisi'	Messina	38°11′N 15°33′E
087/2015	'Lumachedda Chiara'	Ficarra (ME)	38°06′36″N 14°49′47″E
