# Supplementary material for: Preserving Biodiversity in Marginal Rural Areas: Assessment of Morphological and Genetic Variability of a Sicilian Common Bean Germplasm Collection
Source: Plants (Basel). 2020 Aug 4;9(8):989. doi: 10.3390/plants9080989 (PMC7463873; doi:10.3390/plants9080989)
Supplement: Supplementary file 1 [file plants-09-00989-s001.zip › Table S7.xlsx]

## Sheet: Foglio1
Table S7. Rare alleles detected on landraces in homozygous or heterozygous state.
LOCUS	Allele	Frequency	Landraces
			homozygous	heterozygous
PV-ag001	137	0.0175		'Nanu Virdi' 'Nanu Calabrisi'
	147	0.0175	'Calabrisi Baccello Drittu'*
	153	0.0439	'Occhittu Rosa' 'Nanu Palermitanu'	'Nanu Carrazzu'
	155	0.0175	'Virdi Lungarinu'*
GATS91	214	0.0263	'Carrubara Baccello Liscio'	'Occhittu Rosa'
	228	0.0351	'Curnittu Calabrisi' 'Carrazzu Viola'
	230	0.0351	'Nanu Virdi' 'Buttuna di Gaddru'
	232	0.0175		'Nanu Carrazzu'*
	234	0.0351	'Nanu Palermitanu' 'Nanu Niuru'
	248	0.0175	'Rampicanti Nerella' *
BM210	167	0.0175		'Ucchittu di Zappa' 'Setticanni'
	175	0.0175	'Occhittu Rosa'*
	189	0.0175	'Ianchittu ma Beddu'*
	195	0.0175	'Calabrisi Biancu'*
BM160	212	0.0370	Nanu Virdi' 'Nanu di Castania'
	222	0.0185	'Curnittu Calabrisi'*
	232	0.0370	'Crucchittu di Floresta' 'Crucchittu Rummuletta'
	244	0.0093		Ucchittu Santangiulisi'*
	256	0.0185	'Occhittu Rosa'*
BM159	187	0.0175	'Carrazzu di Piano Campo'*
PVBR25	149	0.0182	'Buttuna di Gaddru'*
	155	0.0091		'Crucchittu di Floresta'*
	173	0.0273	'Fasolu di Petra'	'Calabrisi'
	175	0.0091		'Nanu Niuru'*
	177	0.0182	'Pinuttaru'*
BM172	70	0.0089		'Rosa Lungo'*
	74	0.0268	'Fasolu del Prete'	'Lumachedda Chiara'
	90	0.0089		'Lumachedda Chiara'*
	92	0.0357	'Carrazzu Rosa' 'Fasolu di Pasta Biancu'
	112	0.0179	'Occhittu Rosa'*
PVBR163	221	0.0089	'Carrazzu Crioto'*
	223	0.0089	'Carrazzu Crioto'*
	225	0.0179		'Carrazzu Rosa' 'Fasolu di Petra'
	227	0.0179		'Rosa Lungo' 'Carrazzu Rosa'
	244	0.0089		'Rosa Lungo'*
	259	0.0357	'Setticanni' 'Zicca'
* landraces with private alleles
