# Supplementary material for: Preserving Biodiversity in Marginal Rural Areas: Assessment of Morphological and Genetic Variability of a Sicilian Common Bean Germplasm Collection
Source: Plants (Basel). 2020 Aug 4;9(8):989. doi: 10.3390/plants9080989 (PMC7463873; doi:10.3390/plants9080989)
Supplement: Supplementary file 1 [file plants-09-00989-s001.zip › Table S8.xlsx]

## Sheet: Foglio1
Table S8. Posterior membership coefficients following a STRUCTURE analysis and K = 4.
Landrace	Pool1	Pool2	Pool3	Pool4	Pool at K4 (Q≥0.8)
Fasolu del Prete'	0.003	0.057	0.932	0.008	Pool3
Carrubara Baccello Rugoso'	0.984	0.004	0.008	0.005	Pool1
'Buttuna di Gaddru'	0.005	0.137	0.007	0.852	Pool4
'Curnittu Calabrisi'	0.012	0.005	0.006	0.977	Pool4
'Carrubaru Niuru'	0.98	0.004	0.005	0.01	Pool1
'Carrazzu Crioto'	0.01	0.005	0.028	0.956	Pool4
'Calabrisi Baccello Drittu'	0.027	0.004	0.029	0.94	Pool4
'Calabrisi Biancu'	0.971	0.005	0.006	0.018	Pool1
'Carrazzu Viola'	0.068	0.005	0.007	0.921	Pool4
'Bavaluciaru di Tri Voti'	0.011	0.04	0.938	0.01	Pool3
'Rosa Lungo'	0.174	0.01	0.786	0.03	Admixture
'Carrazzu di Maisa'	0.887	0.006	0.022	0.085	Pool1
'Fasolu di Pasta Biancu'	0.682	0.006	0.278	0.034	Admixture
'Santagasi'	0.014	0.004	0.968	0.014	Pool3
'Carrazzu Rosa'	0.726	0.004	0.257	0.013	Admixture
'Fasolu di Petra'	0.279	0.004	0.598	0.119	Admixture
'Mignacca'	0.033	0.009	0.907	0.05	Pool3
'Calabrisi'	0.982	0.004	0.007	0.006	Pool1
'Crucchittu Settembrinu'	0.011	0.005	0.956	0.028	Pool3
'Carrazzu du Miricanu'	0.008	0.005	0.026	0.961	Pool4
'Tignusu Calabrisi'	0.986	0.004	0.005	0.005	Pool1
'Ucchittu di zappa'	0.012	0.005	0.043	0.939	Pool4
'Vanadia di Tortorici'	0.011	0.004	0.024	0.961	Pool4
'Carrazzu pi Siccari'	0.007	0.004	0.008	0.981	Pool4
'Setticanni'	0.005	0.007	0.884	0.104	Pool3
'Ucchittu Santangilisi'	0.021	0.008	0.334	0.636	Admixture
'Crucchittu Criotu'	0.005	0.006	0.854	0.135	Pool3
'Carrubara Baccello Liscio'	0.03	0.072	0.006	0.892	Pool4
'Fasolu di Caminu'	0.008	0.004	0.007	0.981	Pool4
'Lumachedda Chiara'	0.021	0.059	0.082	0.837	Pool4
'Carrazzu di Ucria'	0.007	0.006	0.008	0.979	Pool4
'Crucchittu di Floresta'	0.013	0.008	0.969	0.01	Pool3
'Occhiu di Pirnici'	0.017	0.008	0.146	0.83	Pool4
'Sanfratellano'	0.588	0.006	0.394	0.011	Admixture
'Crucchittu Rummuletta'	0.01	0.004	0.912	0.074	Pool3
'Rosa Tunnu'	0.015	0.005	0.971	0.008	Pool3
'Carrazzu di Piano Campo'	0.005	0.009	0.979	0.006	Pool3
'Carrazzu Niuru pi Siccari'	0.005	0.006	0.64	0.35	Admixture
'Disio'	0.024	0.007	0.017	0.952	Pool4
'Carrazzu Nustrali'	0.006	0.023	0.406	0.565	Admixture
'Niuru Senza Sfilazzi'	0.772	0.004	0.017	0.207	Admixture
'Fasolu di Padre Bernardinu'	0.004	0.44	0.542	0.014	Admixture
'Virdi Lungarinu'	0.005	0.067	0.923	0.005	Pool3
Pinuttaru'	0.004	0.049	0.852	0.095	Pool3
'Rampicanti Nerella'	0.977	0.007	0.009	0.007	Pool1
'Ianchittu ma Beddu'	0.869	0.004	0.004	0.123	Pool1
Zicca'	0.09	0.006	0.834	0.07	Pool3
'Occhittu Rosa'	0.005	0.97	0.008	0.017	Pool2
'Massaru'	0.006	0.005	0.978	0.011	Pool3
'Facigghiuni'	0.005	0.009	0.037	0.949	Pool4
'Munachedda'	0.007	0.011	0.05	0.932	Pool4
BAT93	0.983	0.005	0.008	0.005	Pool1
Jalo_EEP558	0.004	0.981	0.01	0.005	Pool2
Midas	0.004	0.973	0.019	0.004	Pool2
'Nanu Palermitanu'	0.007	0.974	0.005	0.014	Pool2
'Nanu Niuru'	0.564	0.351	0.01	0.075	Admixture
'Nanu Virdi'	0.005	0.972	0.009	0.013	Pool2
'Nanu Calabrisi'	0.006	0.127	0.009	0.859	Pool4
'Nanu di Castania'	0.031	0.39	0.012	0.568	Admixture
'Nanu Carrazzu'	0.006	0.983	0.006	0.004	Pool2
