# Supplementary material for: Preserving Biodiversity in Marginal Rural Areas: Assessment of Morphological and Genetic Variability of a Sicilian Common Bean Germplasm Collection
Source: Plants (Basel). 2020 Aug 4;9(8):989. doi: 10.3390/plants9080989 (PMC7463873; doi:10.3390/plants9080989)
Supplement: Supplementary file 1 [file plants-09-00989-s001.zip › Table S9.xlsx]

## Sheet: Foglio1
Table S9. List of BI/CIAT descriptors (2009) and code number used for morphological characterization of Sicilian common bean germplasm collection. Numbers in parentheses,under each descriptor, corresponding IPGRI descriptor numbers (1982).
DESCRIPTORS		Number code
Seed	Coat pattern (4.3.1)	0 = no pattern
		1= mottled
		2 = striped
		3 = speckled
		4 = spotted
		5 = blotched
		6 = marginal color pattern (virgarcus)
		9 = other
	Coat color (4.3.2)	1 = white
		2 = cream
		3 = yellow
		4 = brown
		5 = pink
		6 = red
		7 = purple
		8 = black
		99 = other
	Prevalent color (Angioi et al. 2009)	1 = lighter color as background and darker color as striped
		2 = darker color as background and lighter color as striped
		3 = darker color and lighter equally distributed
	Seed shape (4.3.5)	1 = circular
		2 = oval
		3 = cuboid
		4 = kidney shaped
		5 = markedly truncate
	Brilliance (4.3.4)	3 = dull
		5 = medium
		7 = shiny
Leaf	Shape *	1 = triangular
		2 = quadrangular
		3 = round
Flower	Color of wings (4.2.5)	1 = white
		2 = green
		3 = liliac
		4 = white with carmine stripes
		5 = strongly veined in red to dark liliac
		6 = plain red to dark liliac
		7 = liliac with dark liliac veins
		8 = purple
		9 = other
	Color of standar (4.2.4)	1 = white
		2 = greenish
		3 = liliac
		4 = white with liliac edge
		5 = white with red stripes
		6 = dark liliac with purple outer edge
		7 = dark liliac with purplish spots
		8 = carmine red
		9 = purple/violet
		99 = other
Pod	Immature color (4.2.6)	1 = dark pruple
		2 = carmine red
		3 = purple stripe on green
		4 = carmine stripe on green
		5 = pale red stripe on green
		6 = dark pink (rose)
		7 = normal green
		8 = shiny green
		9 = dull green tosilver grey
		10 = golden or deep yellow
		11 = pale yellow ti white
		99 = other
	Physiological maturity color *	1 = dark pruple
		2 = red
		3 = pink
		4 = yellow
		5 = pale yellow with cloured mottling stripes
		6 = persisten green
	Curvature *	3 = straigth
		5 = lightly curved
		7 = curved
		9 = recurving
* descriptors listed only in IPGRI 1982
