# Supplementary material for: Preserving Biodiversity in Marginal Rural Areas: Assessment of Morphological and Genetic Variability of a Sicilian Common Bean Germplasm Collection
Source: Plants (Basel). 2020 Aug 4;9(8):989. doi: 10.3390/plants9080989 (PMC7463873; doi:10.3390/plants9080989)
Supplement: Supplementary file 1 [file plants-09-00989-s001.zip › Table S10.xlsx]

## Sheet: Foglio1
Table S10. Microsatellite primer pairs (SSR) used for genetic characterization of Sicilian common bean germplasm collection.
Locus	Genebank code	Repeat motif	Forward primer	Reverse primer	Allele size	Dye color	References
BM159	AF483875	(CT)9(CA)8	GGTGCTGTTGCTGCTGTTAT	GGGAGATGTGGTAAGATAATGAAA	198	HEX	Gaitán-Solís et al. 2002
BM160	AF483876	(GA)15(GAA)5	CGTGCTTGGCGAATAGCTTTG	CGCGGTTCTGATCGTGACTTC	211	FAM	Gaitán-Solís et al. 2002
BM172	AF483884	(GA)23	CTGTAGCTCAAACAGGGCACT	GCAATACCGCCATGAGAGAT	107	HEX	Gaitán-Solís et al.2002
BM210	AF483902	(CT)15	CCCTCATCCTCCATTCTTATCG	ACCACTGCAATCCTCATCTTTG	166	ATTO565	Gaitán-Solís et al. 2002
GATS91	AF483842	(GA)17	GAGTGCGGAAGCGAGTAGAG	TCCGTGTTCCTCTGTCTGTG	229	HEX	Gaitán-Solís et al. 2002
PV-ag001	M75856	(GA)11	CAATCCTCTCTCTCTCATTTCCAATC	GACCTTGAAGTCGGTGTCGTTT	157	FAM	Yu et al. 2000
PVBR25	DQ185890	(CT)23	GAGCTTCTCCGTCCTGTGT	CGAACTGAATCAGAAAGGAA	158	ATTO565	Buso et al. 2006
PVBR163	BV686505	(AG)16	TGAGAGTGGAGAAGGAGAGAGA	TGACAACACTGCAAACACCA	217	ATTO565	Buso et al. 2006
